# Supplementary material
Source: PubMed Central journal article supplement (PMC2819227)
Supplement: NIHMS172230-supplement-Supp_Table_3.pdf [file NIHMS172230-supplement-Supp_Table_3.pdf]

**Supplementary Table 3.**

| Cells injected/fat pad | Primary Tumors/injections |                         |                         |              |              |            |
|------------------------|---------------------------|-------------------------|-------------------------|--------------|--------------|------------|
|                        | <b>1x10<sup>5</sup></b>   | <b>5x10<sup>4</sup></b> | <b>1x10<sup>4</sup></b> | <b>5,000</b> | <b>1,000</b> | <b>500</b> |
| <b>SUM159</b>          |                           |                         |                         |              |              |            |
| ALDEFLUOR-negative     | 0/3                       | ---                     | 0/2                     | ---          | 0/3          | ---        |
| ALDEFLUOR-positive     | 3/3                       | ---                     | 1/1                     | ---          | 3/3          | ---        |
| Unseparated            | 3/3                       | ---                     | 1/1                     | ---          | 2/3          | ---        |
| <b>MDA-MB-453</b>      |                           |                         |                         |              |              |            |
| ALDEFLUOR-negative     | ---                       | 1/3                     | ---                     | 0/3          | ---          | 0/4        |
| ALDEFLUOR-positive     | ---                       | 3/3                     | ---                     | 3/3          | ---          | 1/4        |
| Unseparated            | ---                       | 3/3                     | ---                     | 3/3          | ---          | 1/4        |
| <b>BrCa-MZ-01</b>      |                           |                         |                         |              |              |            |
| ALDEFLUOR-negative     | 3/3                       | 2/3                     | 2/3                     | 2/3          | 1/3          | 1/3        |
| ALDEFLUOR-positive     | 3/3                       | 3/3                     | 3/3                     | 3/3          | 3/3          | 3/3        |
| Unseparated            | 3/3                       | 3/3                     | 3/3                     | 3/3          | 3/3          | 3/3        |
